1 Individual tree-crown detection in RGB imagery using semi-supervised deep learning neural  
2 networks

3 Ben. G. Weinstein<sup>1</sup>, Sergio Marconi<sup>1</sup>, Stephanie Bohlman<sup>2</sup>, Alina Zare<sup>3</sup>, Ethan White<sup>1</sup>

4 <sup>1</sup> Department of Wildlife Ecology and Conservation, University of Florida, Gainesville, Florida, USA

5 <sup>2</sup> School of Forest Resources and Conservation, University of Florida, Gainesville, Florida, USA

6 <sup>3</sup> Department of Electrical and Computer Engineering, University of Florida, Gainesville, Florida, USA

7 Abstract

8 Remote sensing can transform the speed, scale, and cost of biodiversity and forestry surveys.  
9 Data acquisition currently outpaces the ability to identify individual organisms in high resolution  
10 imagery. We outline an approach for identifying tree-crowns in RGB imagery using a semi-  
11 supervised deep learning detection network. Individual crown delineation has been a long-  
12 standing challenge in remote sensing and available algorithms produce mixed results. We show  
13 that deep learning models can leverage existing lidar-based unsupervised delineation to create  
14 generated trees to train an initial RGB crown detection model. Despite limitations in the original  
15 unsupervised detection approach, this noisy training data may contain information from which  
16 the neural network can learn initial tree features. We then refine the initial model using a small  
17 number of higher-quality hand-annotated RGB images. We validate our proposed approach  
18 using an open-canopy site in the National Ecological Observation Network. Our results show  
19 that a model using 434,551 self-generated trees with the addition of 2,848 hand-annotated  
20 trees yields accurate predictions in natural landscapes. Using an intersection-over-union  
21 threshold of 0.5, the full model had an average tree crown recall of 0.69, with a precision of  
22 0.61 for visually-annotated data. The model had an average tree detection rate of 0.82 for field  
23 collected stems. The addition of a small number of hand-annotated trees improved

24 performance over the initial self-supervised model. This semi-supervised deep learning  
25 approach demonstrates that remote sensing can overcome a lack of labeled training data by  
26 generating noisy data for initial training using unsupervised methods and retraining the  
27 resulting models with high quality labeled data.

28 Keywords: Deep Learning; Trees; Detection; Remote Sensing; LIDAR; RGB; NEON

## 29 1. Introduction

30 The cost of human observation limits our ability to understand the natural world. Image-based  
31 artificial intelligence can advance our understanding of individual organisms, species, and  
32 ecosystems by greatly increasing the scale and efficiency of data collection [1]. The growing  
33 availability of sub-meter airborne imagery brings opportunities for remote sensing of biological  
34 landscapes that scales from individual organisms to global systems. However, the use of this  
35 imagery remains limited by the laborious, non-reproducible, and costly annotation of these  
36 datasets [2].

37 Tree detection is a central task in forestry and ecosystem research and both commercial  
38 and scientific applications rely on delineating individual tree crowns from imagery [3,4]. While  
39 there has been considerable research in unsupervised tree detection using airborne LIDAR  
40 (Light Detection and Ranging; a sensor that uses laser pulses to map three dimensional  
41 structure) [3,5,6], less is known about tree detection in RGB (red, green, blue) orthophotos.  
42 Compared to LIDAR, two dimensional RGB orthophotos are less expensive to acquire and easier  
43 to process but lack direct three-dimensional information on crown shape. Effective RGB-based  
44 tree detection would unlock data at much larger scales due to increasing satellite-based RGB  
45 resolution and the growing use of uncrewed aerial vehicles. Initial studies of tree detection in

46 RGB imagery focused on pixel-based methods and watershed algorithms to find local maxima  
47 among pixels to create potential tree crowns [7]. Combined with hand-crafted rules on tree  
48 geometries, these approaches separately performed tree-detection and crown delineation  
49 [8,9]. The need to hand-craft tree geometry rules makes it a challenge to create a single  
50 approach that encompass a range of tree types [10].

51         Deep learning is a well-established method for detecting and identifying objects in RGB  
52 images but has only recently been applied to vegetation detection [11,12]. Compared to  
53 previous rule-based approaches, deep learning has three features that make it ideal for tree  
54 detection. First, convolutional neural networks (CNNs) delineate objects of interest directly  
55 from training data rather than using hand-crafted pixel features. This reduces the expertise  
56 required for each use-case and improves transferability among projects [13]. Second, CNNs  
57 learn hierarchical combinations of image features that focus on object-level, rather than pixel-  
58 level, representations of objects. Finally, neural networks are re-trainable to incorporate the  
59 idiosyncrasies of individual datasets. This allows models to be refined with data from new local  
60 areas without discarding information from previous training sets.

61         The challenge for applying deep learning to natural systems is the need for large training  
62 datasets. A lack of training data is a pervasive problem in remote sensing due to the cost of  
63 data collection and annotation [14]. In addition, the spatial extent of training data often  
64 prohibits field-based verification of annotated objects. For tree detection, the high variation in  
65 tree crown appearance due to taxonomy, health status, and human management increases the  
66 risk of overfitting when using small amounts of training data [11]. One approach to addressing  
67 data limitation in deep learning is “self-supervised learning” (*sensus* [15]), which uses

68 unsupervised methods to generate training data that is used to train supervised models [16].  
69 This approach has recently been applied to remote sensing for hyperspectral image  
70 classification [10]. Self-supervision, which relies only on unlabeled data, can be combined with  
71 labeled data in a semi-supervised framework (*sensu* Zu 2005), which may improve deep  
72 learning on limited training data by providing neural networks the opportunity to learn  
73 generalized features on a wider array of training examples, followed by retraining on a smaller  
74 number of high quality annotations [17]. Given the imperfect nature of existing unsupervised  
75 tree delimitation approaches, it is unknown whether moderate to low quality annotations can  
76 be used to generate trees for model training.

77 In this paper, we propose a semi-supervised pipeline for detecting tree crowns based on  
78 RGB data. This pipeline is outlined in Fig. 1. In the proposed workflow, a LIDAR unsupervised  
79 algorithm generates initial tree predictions. The bounding box for each tree is extracted and the  
80 corresponding RGB crop is used to train an initial deep learning model. Then, using this self-  
81 supervised model as a starting point, we retrain the model using a small number of hand-  
82 annotations to correct errors from the unsupervised detection. The LIDAR data is used only to  
83 improve the initial training of the network. It is not used for the final prediction step. The result  
84 is a deep learning neural network that combines unsupervised and supervised approaches to  
85 perform tree delineation in new RGB imagery without the need for co-registered LIDAR data.  
86 This provides the potential for expanding the use of deep learning in remote sensing  
87 applications with limited labeled data by exploring whether generating hundreds of thousands  
88 of noisy labels will yield improved performance even though these labeled data are imperfect  
89 due to the limitations of the generative algorithm [18].

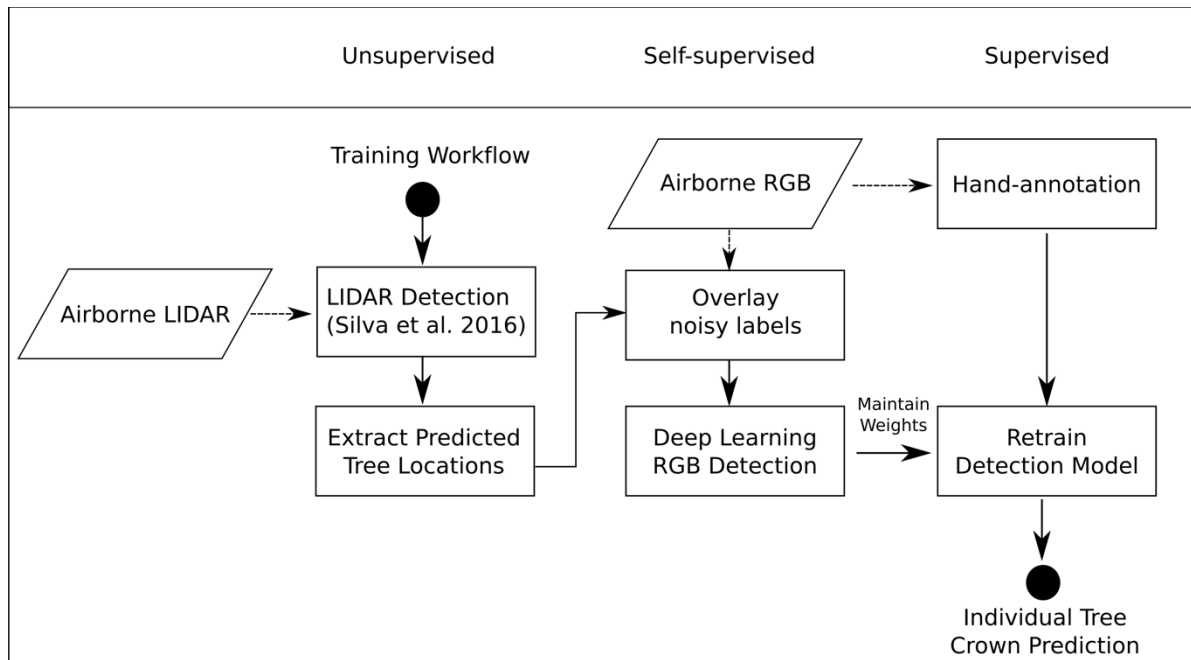

90

91 Figure 1. A conceptual figure of the proposed semi-supervised pipeline. A LIDAR-based  
92 unsupervised detection generates initial training data for a self-supervised RGB deep learning  
93 model. The model is then retrained based on a small number of hand-annotated trees to create  
94 the full model.

## 95 2. Materials and Methods

### 96 2.1. Study Site and Field Data

97 We used data from the National Ecological Observatory Network (NEON) site at the San Joaquin  
98 Experimental Range in California to assess our proposed approach (Figure 2). The site contains  
99 open woodland of live oak (*Quercus agrifolia*), blue oak (*Quercus douglasii*) and foothill pine  
100 (*Pinus sabiniana*) forest. The majority of the site is a single-story canopy with mixed understory  
101 of herbaceous vegetation. All aerial remote sensing data products were provided by the NEON  
102 Airborne Observation Platform. We used the NEON 2018 “classified LiDAR point cloud” data  
103 product (NEON ID: DP1.30003.001), and the “orthorectified camera mosaic” (NEON ID:

104 DP1.30010.001). The LiDAR data consist of 3D spatial point coordinates (4-6 points/m<sup>2</sup>) which  
105 provides high resolution information about crown shape and height. The RGB data are a 1km x  
106 1km mosaic of individual images with a cell size of 0.1 meters. Both data products are  
107 georeferenced in the UTM projection Zone 11. In addition to airborne data, NEON field teams  
108 semi-annually catalog “Woody Plant Vegetation Structure” (NEON ID: DP1.10098.001), which  
109 lists the tag and species identity of trees with DBH > 10cm in 40m x 40m plots at the site. For  
110 each tagged tree, the trunk location was obtained using the azimuth and distance to the  
111 nearest georeferenced point within the plot. All data are publicly available on the NEON Data  
112 Portal (<http://data.neonscience.org/>). All code for this project is available on GitHub  
113 (<https://github.com/weecology/DeepLidar>) and archived on Zenodo (Weinstein and White  
114 2019).

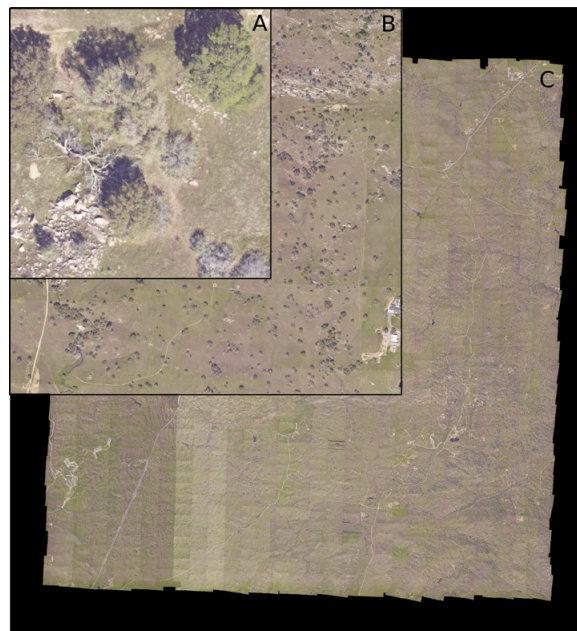

115  
116 Figure 2. The San Joaquin, CA (SJER) site (C) in National Ecological Observation Network  
117 contains 148 1km<sup>2</sup> tiles (B), each with a spatial resolution of 0.1m. For our analysis, we further  
118 divided each tile in 40x40m windows (A) for individual tree prediction (n=729 per 1km<sup>2</sup> tile).

119 For hand annotations, we selected two 1km x 1km RGB tiles and used the program  
120 RectLabel (<https://rectlabel.com/>) to draw bounding boxes around each visible tree. We chose  
121 not to include snags, or low bushes that appeared to be non-woody. In total, we hand-  
122 annotated 2,848 trees for the San Joaquin site. In addition to the 1km tile, we hand-annotated  
123 canopy bounding boxes on the cropped RGB images for each NEON field plot (n=35), which  
124 were withheld from training and used as a validation dataset.

## 125 2.2. Unsupervised LIDAR Detection

126 We tested three existing unsupervised algorithms for use in generating trees for the self-  
127 supervised portion of the workflow [19–21]. Existing unsupervised algorithms yield imperfect  
128 crown delineations in part because: 1) the algorithms are not designed to learn the specifics of  
129 different regions and datasets; 2) it is difficult to design hand-crafted features that are flexible  
130 enough to encompass the high variability in tree appearance; 3) distinguishing between trees  
131 and vertical objects such as boulders and artificial structures can be difficult with only three-  
132 dimensional LIDAR data. We evaluated three available unsupervised LIDAR detection algorithms  
133 in order to choose the best performing algorithm to generate training labels [19–21]. We then  
134 used the best performing method ([21]) to create initial self-supervised tree predictions in the  
135 LIDAR point cloud. This algorithm uses a canopy height model and threshold of tree height to  
136 crown width to cluster the LIDAR cloud into individual trees (Figure 3). We used a canopy height  
137 model of 0.5m resolution to generate local tree tops, and a maximum crown diameter of 60%  
138 of tree height. A bounding box was automatically drawn over the entire set of points assigned  
139 to each tree to create the training trees. In total, we generated 434,551 unsupervised tree  
140 labels to use during model training.

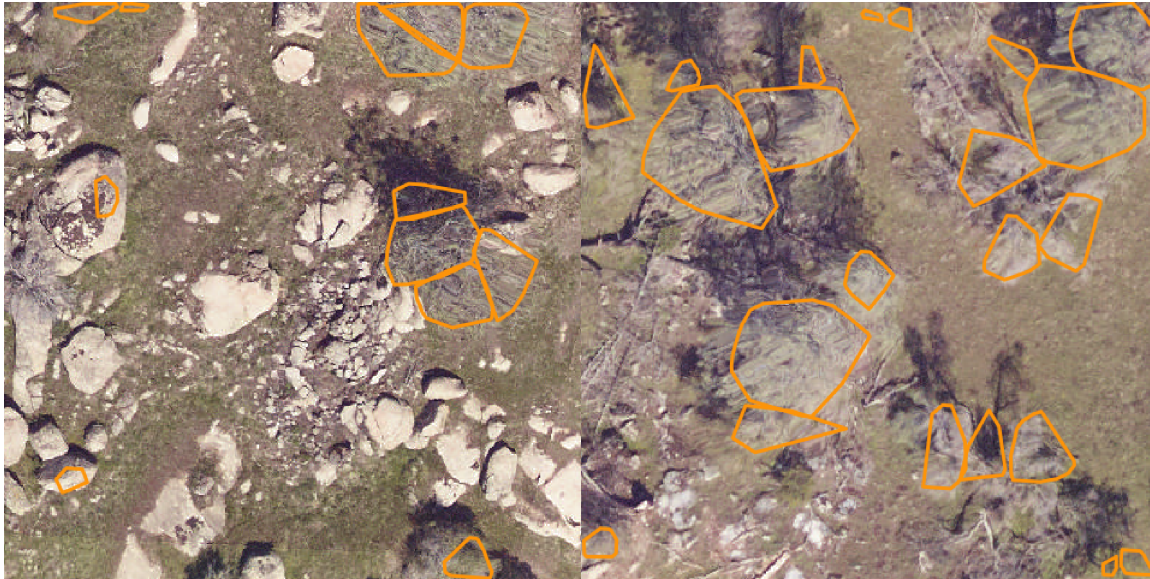

141

142 Figure 3. Example results from the Silva et al. 2016 unsupervised lidar algorithm [21], as  
143 implemented in the R liDR package [22]. Two plots from the San Joaquin NEON site are shown  
144 (SJER\_009, SJER\_010).

### 145 2.3. Deep Learning RGB detection

146 Convolutional neural networks are often used for object detection, due to their ability to  
147 represent semantic information as combinations of image features. Early applications passed a  
148 sliding window over the entire image and treated each window as a separate classification  
149 problem. This approach was slow and enforced arbitrary decisions for window size and shape.  
150 This was improved by considering potential detection boxes generated by image segmentation  
151 techniques [23] or by combining the bounding box proposal and classification into a single deep  
152 learning framework [24]. We chose the retinanet one-stage detector [25,26], which allows pixel  
153 information to be shared at multiple scales, from individual pixels to groups of connected  
154 objects for learning both bounding boxes and image classes. We used a resnet-50 classification  
155 backbone pretrained on the ImageNet dataset [27]. We experimented with deeper



156 architectures (resnet-101 and resnet-152) but found no improvement that offset the increased  
157 training time.

158         Since the entire 1km RGB tile cannot fit into GPU memory, we first cut the tile into  
159 smaller windows for model training. We experimented with a number of different window sizes  
160 and found optimal performance at 400 X 400 pixels due to a balance between memory  
161 constraints and providing the model sufficient spatial context for tree detection. This resulted  
162 in 729 windows per 1km tile. The order of tiles and windows were randomized before training.  
163 Using the pool of unsupervised tree predictions, we trained the network with a batch size of 6  
164 on a Tesla K80 GPU for 8 epochs. After prediction, we passed each image through a non-max  
165 suppression filter to remove predicted boxes that overlapped by more than 15%, maintaining  
166 only the box with the superior predicted score. One advantage of this neural network approach  
167 is that each predicted bounding box has an associated confidence score. We removed boxes  
168 within confidence scores less than 0.2.

#### 169         2.4. Model Evaluation

170 We used the NEON woody vegetation data to evaluate model recall using field-collected points  
171 corresponding to individual tree stems. A field-collected tree point was considered correctly  
172 predicted if the point fell within a predicted bounding box. This is a more conservative  
173 approach than most over studies, where the field-collected tree point is considered correctly  
174 predicted if an edge of the bounding box falls within a horizontal search radius (e.g 3m in [28]  
175 to 8m in [29]). Due to these variations in accuracy measurement, it is difficult to establish state-  
176 of-art performance, but 70-80% detection rate between predicted trees and field located trees  
177 is typical [5,10]. Given the variation in tree appearance and segmentation difficulty, there are

178 too few previous attempts at individual tree crown prediction to provide an expectation for  
179 accuracy.

180 To evaluate the hand-annotated crown areas, we computed recall and precision based  
181 on an intersection-over-union score of greater than 0.5 for each predicted crown. The  
182 intersection-over-union evaluation metric measures the area of overlap divided by the area of  
183 union of the ground truth bounding box and the predicted bounding box. Direct comparisons of  
184 predicted and observed crown overlap are rarely performed due to the difficulty of collecting  
185 data for a sufficient number of validation examples. The most common approach is to compare  
186 the predicted crown area to a matched tree, such as in [30] or use per pixel overlap in visually  
187 annotated data [10,31]. Compared to previous works, our use of a minimum 0.5 intersection-  
188 over-union score is more stringent. We chose this value because it more closely resembles the  
189 required accuracy for forestry and ecological investigations [32].

### 190 3. Results

191 Initial exploration of existing lidar-based tree detection tools showed that the best performing  
192 algorithm [21] was able to correctly recall the crown area of 14% of trees at intersection-over-  
193 union score of 0.5 (Table 1). Challenges included over-segmentation of large individual trees,  
194 erroneous predicted tree objects based on imperfections in the ground model, and inclusion of  
195 non-tree vertical objects (Figure 3).

196 Table 1. Exploratory analysis of lidar-based unsupervised algorithms. Recall and precision  
197 statistics are shown for intersection-over-union with a threshold of 0.5 overlap for the hand  
198 annotated trees on the NEON field plots (n=271 trees).

| <b>LIDAR Algorithm</b> | <b>Recall</b> | <b>Precision</b> |
|------------------------|---------------|------------------|
| Li et. al (2012)       | 0.107         | 0.021            |
| Dalponte et al. (2016) | 0.138         | 0.083            |
| Silva et al. (2016)    | 0.142         | 0.071            |

199  
200 Using the bounding boxes from the Silva et al. (2016) predictions, we extracted RGB crops and  
201 pretrained the RGB neural network. This self-supervised network had a field collected stem  
202 recall of 0.83, and a hand-annotated crown area recall of 0.53 with a precision of 0.32.  
203 Retraining the self-supervised model with hand-annotated trees increased the recall of the  
204 hand annotated tree crowns to 0.69 with a precision of 0.61 (Table 2, Figure 4). The field  
205 collected stem recall did not meaningfully change among models.

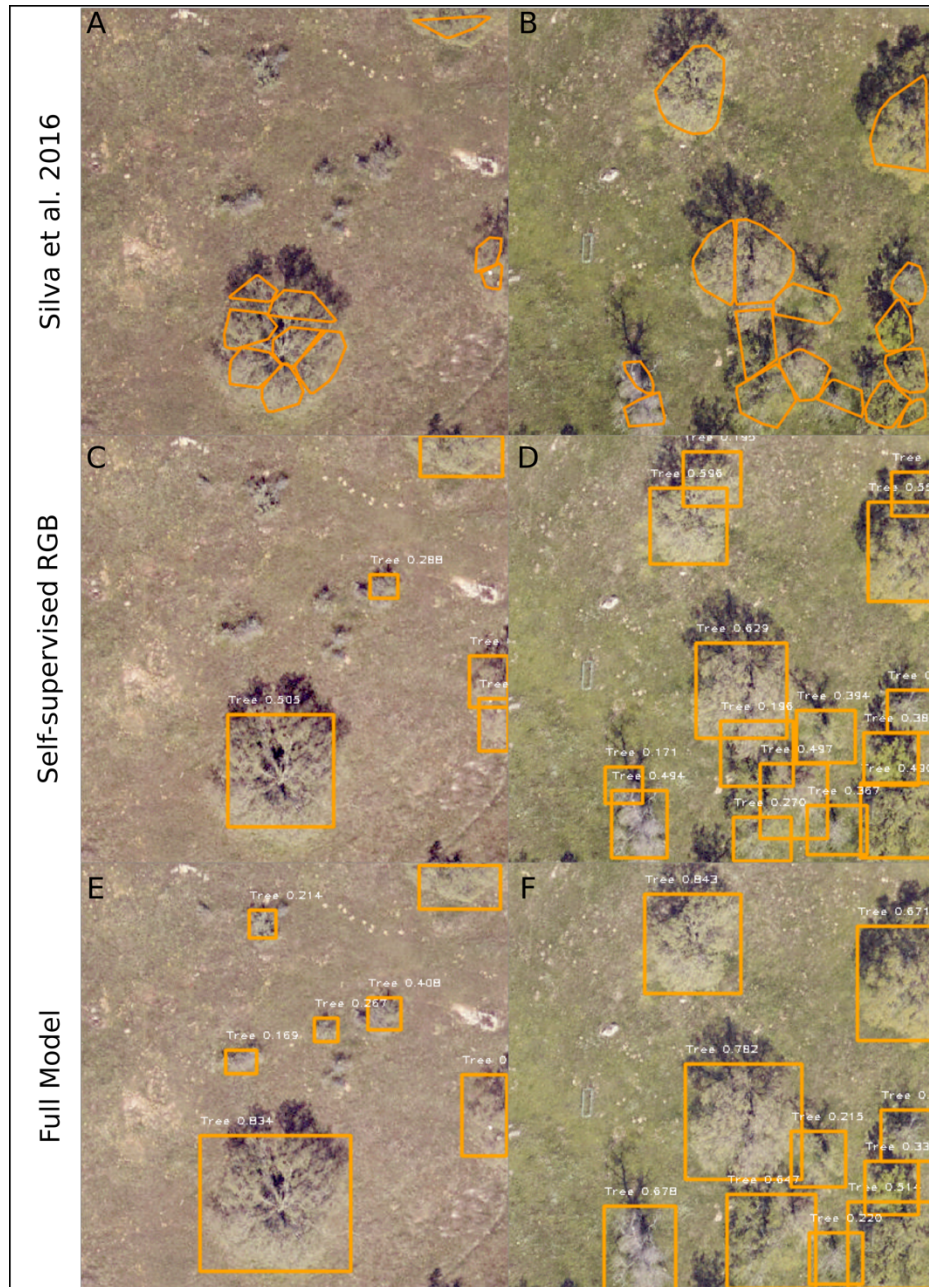

206

207 Figure 4. Predicted individual tree crowns for the unsupervised lidar (A, B), self-supervised RGB

208 (C, D) and full (semi-supervised) model (E, F) for two NEON tower plots, SJER\_015 (A, C, E), and

209 SJER\_053 (B, D, F) at the San Joaquin, CA site. For each tree prediction, the detection

210 probability is shown in white.

211 Table 2. Evaluation metrics for each of the models. All evaluation was conducted on the 34  
212 NEON field plots. Stem recall was calculated using the field-collected tree stem locations (n=111  
213 trees). Precision and recall for crown overlap was calculated on hand-annotated bounding  
214 boxes around each tree crown (n=271 trees) with a minimum predicted probability threshold of  
215 0.5.

| Model                | Hand-annotated crown<br>overlap (>50%) |           | Stem Recall |
|----------------------|----------------------------------------|-----------|-------------|
|                      | Recall                                 | Precision |             |
| Silva et al. 2016    | 0.14                                   | 0.07      | 0.79        |
| Hand-annotation only | 0.38                                   | 0.60      | 0.79        |
| Self-supervised RGB  | 0.53                                   | 0.32      | 0.83        |
| Full Model           | 0.69                                   | 0.61      | 0.81        |

216  
217 By comparing images of the predictions from the unsupervised lidar detection, the self-  
218 supervised RGB deep learning model, and the combined full model, we can learn about the  
219 contributions of each stage of the pipeline. The LIDAR unsupervised detection does a good job  
220 of identifying trees versus background based on height. Most small trees are well segmented,  
221 but there is consistent over-segmentation of the large trees, with multiple crown predictions  
222 abutting together. Visual inspection shows that these predictions represent multiple major  
223 branches of a single large tree, rather than multiple small trees (Figure 4a). In the self-  
224 supervised RGB model, these large trees are more accurately segmented, but there is a

225 proliferation of bounding boxes, and overall lower confidence scores for even well-resolved  
226 trees (Figure 4d). This is shown in the precision-recall curves for the hand-annotated validation  
227 data, in which the self-supervised model more rapidly declines in precision at higher score  
228 thresholds (Figure 5).

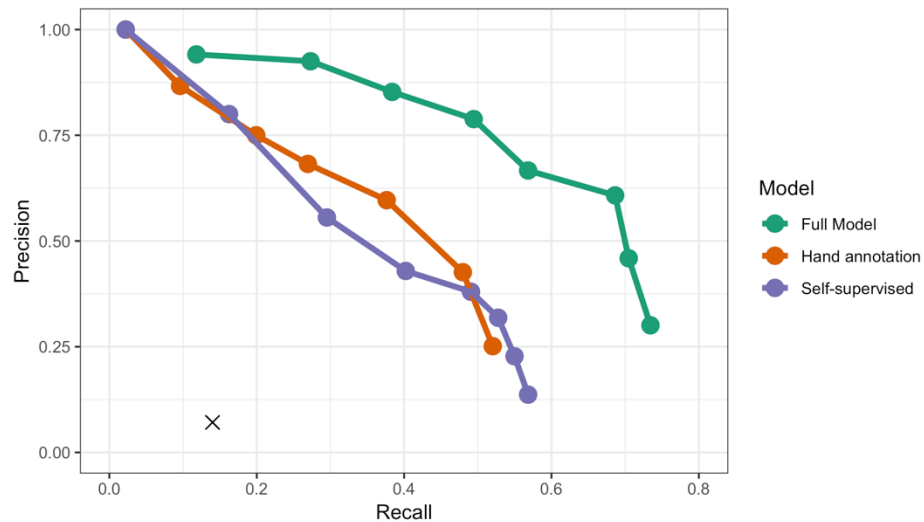

229  
230 Figure 5. Precision-recall curves for the hand-annotated NEON plots. For each model, we  
231 calculated the proportion of correctly predicted boxes for score thresholds [0,0.1,...,0.7]. An  
232 annotation was considered correctly predicted if the intersection-over-union (IoU) score was  
233 greater than 0.5. The recall and precision scores for the initial lidar-based unsupervised  
234 algorithm is shown in black X.

235 By combining the self-supervised and the hand annotated datasets, the full model  
236 reduces the extraneous boxes and improves the segmentation of large trees (Figure 6). The full  
237 model has optimal performance in areas of well-spaced large trees (Figure 6b) but tends to  
238 under-segment small clusters of trees (Figure 6c).

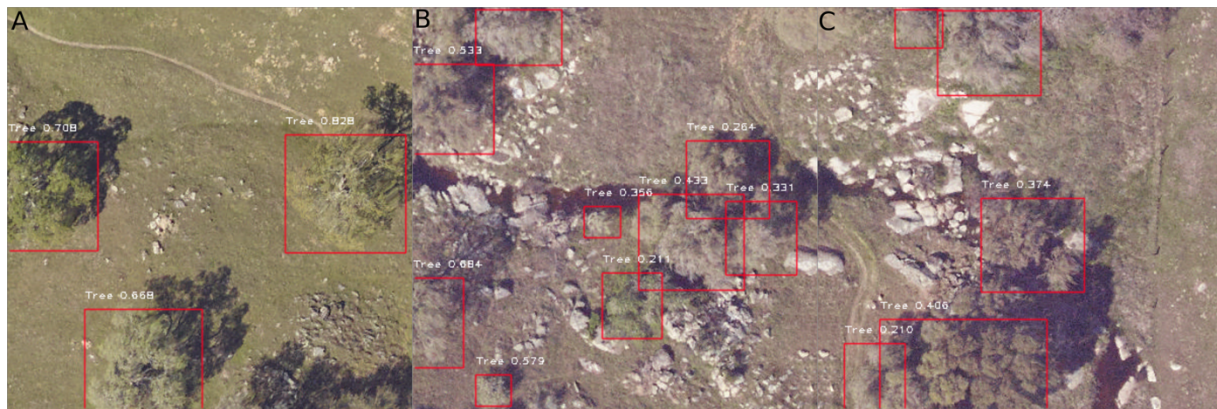

239

240 Figure 6. Predictions from the full model on the validation 1km<sup>2</sup> tile. Canopy complexity  
241 increases from a) well-defined large trees to B) mixed-species canopies to c) tightly packed  
242 clusters of trees. As canopy complexity increases, the full model tends to under-segment small  
243 tree clusters.

#### 244 4. Discussion

245 Using recent developments in deep learning, we built a neural network-based pipeline for  
246 identifying individual trees in RGB imagery. Commercial high resolution RGB data is increasingly  
247 available at near global scales, meaning that accurate RGB based crown delineation methods  
248 could be used to detect overstory trees at unprecedented extents. To address the long-standing  
249 challenge of a lack of labeled training data, we used an unsupervised LIDAR tree detection  
250 algorithm to generate labels for initial training. This self-supervised approach allows the  
251 network to learn the general features of trees even if the LIDAR-based unsupervised detection  
252 is imperfect. The addition of only 2,848 hand-annotated trees generated a final model that  
253 performed well when applied to a large geographic area. This approach opens the door for the  
254 use of deep learning in airborne biodiversity surveys, despite the persistent lack of annotated  
255 data in forestry and ecology datasets.

256 Many of the false positives in our evaluation dataset were due to disagreements  
257 between the hand annotations, unsupervised LIDAR pretraining and RGB prediction in what  
258 defines a tree. For example, small trees were often considered too low for inclusion in the  
259 LIDAR algorithm (Figure 4a), whereas they were included in the full model based on the hand-  
260 annotations (Figure 2b). Similarly, large bushes were sometimes included in hand annotations  
261 due to the difficulty of determining overall woody structure. When deploying these models to  
262 applied problems, it will be important to have strict quantitative guidelines that define class  
263 definitions. Where LIDAR data is available, draping the 2D boxes over the 3D point cloud to  
264 filter out points based on vertical height should be useful for improving precision. It should be  
265 noted that the quantitative results are likely biased toward the RGB model, since the hand-  
266 annotations were made by looking at the RGB, and not the LIDAR data. However, the good  
267 recall rate for the field-collected stems suggests that hand annotations were useful in capturing  
268 field conditions. An unexpected benefit of the RGB model was the ability to discriminate trees  
269 from other vertical objects, such as houses or poles, despite a lack of distinction in the  
270 unsupervised LIDAR training data (Figure 7). This may be useful in urban tree detection and  
271 other non-forested sites.



272

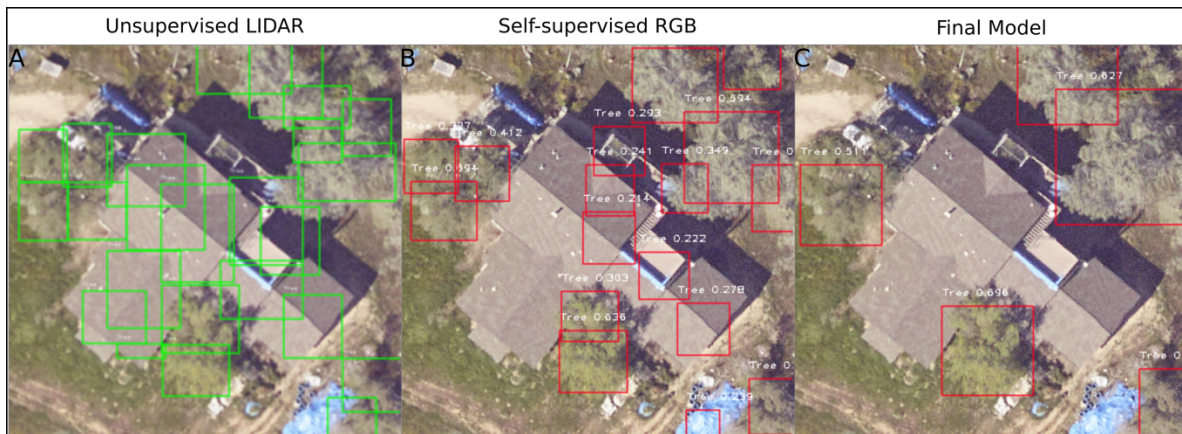

273

274 Figure 7. Improvement in prediction quality during the training pipeline. A) Bounding boxes  
275 from the lidar-based unsupervised detection erroneously identified artificial structures as trees.  
276 B) Predictions from the self-supervised RGB model showed that the addition of RGB data  
277 diminished the effect of incorrectly labeled training data, with only edges of the artificial  
278 structures maintained as tree predictions. C) In the full semi-supervised model, combining the  
279 self-supervised RGB data with hand-annotations eliminated the influence of the original  
280 misclassification in the training data, while still capturing the majority of trees in the image.

281 It is likely that accurate tree detection will be region specific, and that the best model will  
282 vary among environments. This will require training a new model for each geographic area  
283 using both RGB and LIDAR training data. The proposed approach could save resources by  
284 allowing a smaller scale LIDAR flight to generate training data, and then cover a much larger  
285 area with less expensive RGB orthophotos. Uncrewed aerial vehicles (UAVs) can be used for  
286 capturing LIDAR at high resolution, but at a limited spatial extent. In combination with our  
287 method, these UAVs may allow cost effective development of custom regional tree detection  
288 models. In addition, the National Ecological Observatory Network, which provided the data for

289 this analysis, has 45 forested NEON sites selected to cover the major ecoclimatic domains in the  
290 United States. These sites could serve as pools of LIDAR and RGB data at 10,000 ha scales for  
291 regional model training. Combining these two detectors together could produce accurate  
292 individual level tree maps at broad scales, with potential applications to forest inventory,  
293 ecosystem health, post-natural disaster recovery, and carbon dynamics.

294 While the semi-supervised deep learning method performed well at the open-canopy test  
295 site, geographic areas with complex canopy conditions will be more challenging. The current  
296 model only uses LIDAR in the pretraining step. Where available, directly incorporating a LIDAR  
297 canopy height model into the deep learning approach should allow the model to  
298 simultaneously learn the vertical features of individual trees in addition to the two-dimensional  
299 color features in the RGB data. Recent applications of three-dimensional CNNs [33], as well as  
300 point-based semantic segmentation [34], provide new avenues for joint multi-sensor modeling.  
301 These developments will be crucial in segmenting complex canopies that overlap in the two-  
302 dimensional RGB imagery. In addition, recent extensions of region-proposal networks refine  
303 bounding boxes to identify the individual pixels that belong to a class [35]. This will provide a  
304 better estimate of tree crown area, as trees typically have a non-rectangular shape.

## 305 5. Conclusions

306 Applying deep learning models to natural landscapes opens new opportunities in ecology,  
307 forestry, and land management. Despite a lack of high-quality training data, deep learning  
308 algorithms can be deployed for tree prediction using unsupervised detection to produce  
309 generated trees for pretraining the neural network. Although the lidar-based algorithm used to  
310 generate the pretraining data achieved less than 20% recall of hand-annotated tree crowns, the

311 deeply learned RGB features from those data achieved greater than 50% recall. When  
312 combined with a small number of hand-annotated images, recall increased to 69% with 60%  
313 precision. As shown by the comparison with field-collected stems, the majority of the remaining  
314 predictions represent valid trees (>80%), but the overlap with hand-estimated crown area was  
315 less than the desired 50%. Many previous papers have used a lower overlap threshold (e.g.,  
316 20% overlap in [36]), and we expect this value to improve with a combination of better  
317 validation data and more hand-annotated training samples.

318 In addition to scaling tree detection at much lower costs, there is the potential for this  
319 method to provide additional important information about natural systems. The current model  
320 could be expanded from a single class, “Tree”, to one that provides more detailed classifications  
321 based on taxonomy and health status. For example, splitting the “Tree” class into living and  
322 dead trees would provide management insight when surveying for outbreaks of tree pests and  
323 pathogens [37], as well as post-fire timber operations [38]. With the addition of hyperspectral  
324 data, dividing the tree class into species labels yields additional insights into the economic  
325 value, ecological habitat, and carbon storage capacity for large geographic areas [39]. As such,  
326 deep learning-based approaches provide the potential for large scale actionable information on  
327 natural systems to be derived from remote sensing data.

## 328 6. Author Contributions

329 BGW, EPW, SB and AZ conceived of project design. EW and SM collected the preliminary data.

330 BGW performed the analysis and wrote the text. All authors contributed to the text.

## 331 7. Funding

332 This research was supported by the Gordon and Betty Moore Foundation's Data-Driven  
333 Discovery Initiative through grant GBMF4563 to E.P. White. The authors declare no conflict of  
334 interest.

## 335 8. References

- 336 1. Anderson, C.B. Biodiversity monitoring, earth observations and the ecology of scale. *Ecol.*  
337 *Lett.* **2018**.
- 338 2. Weinstein, B.G. A computer vision for animal ecology. *J. Anim. Ecol.* **2018**, *87*, 533–545.
- 339 3. Wu, B.; Yu, B.; Wu, Q.; Huang, Y.; Chen, Z.; Wu, J. Individual tree crown delineation using  
340 localized contour tree method and airborne LiDAR data in coniferous forests. *Int. J. Appl.*  
341 *Earth Obs. Geoinf.* **2016**, *52*, 82–94.
- 342 4. Caughlin, T.T.; Graves, S.J.; Asner, G.P.; Van Breugel, M.; Hall, J.S.; Martin, R.E.; Ashton,  
343 M.S.; Bohlman, S.A. A hyperspectral image can predict tropical tree growth rates in  
344 single-species stands. *Ecol. Appl.* **2016**, *26*, 2367–2373.
- 345 5. Ayrey, E.; Fraver, S.; Kershaw, J.A.; Kenefic, L.S.; Hayes, D.; Weiskittel, A.R.; Roth, B.E.  
346 Layer Stacking: A Novel Algorithm for Individual Forest Tree Segmentation from LiDAR  
347 Point Clouds. *Can. J. Remote Sens.* **2017**, *43*, 16–27.
- 348 6. Liu, T.; Im, J.; Quackenbush, L.J. A novel transferable individual tree crown delineation  
349 model based on Fishing Net Dragging and boundary classification. *ISPRS J. Photogramm.*  
350 *Remote Sens.* **2015**, *110*, 34–47.
- 351 7. Gougeon, F.A.; Leckie, D.G. The Individual Tree Crown Approach Applied to Ikonos  
352 Images of a Coniferous Plantation Area. *Photogramm. Eng. Remote Sens.* 2006, *72*, 1287–  
353 1297.

- 354 8. Liu, T.; Im, J.; Quackenbush, L.J. A novel transferable individual tree crown delineation  
355 model based on Fishing Net Dragging and boundary classification. *ISPRS J. Photogramm.*  
356 *Remote Sens.* **2015**, *110*, 34–47.
- 357 9. Weinmann, M.; Weinmann, M.; Mallet, C.; Brédif, M. A classification-segmentation  
358 framework for the detection of individual trees in dense MMS point cloud data acquired  
359 in urban areas. *Remote Sens.* **2017**, *9*.
- 360 10. Gomes, M.F.; Maillard, P.; Deng, H. Individual tree crown detection in sub-meter satellite  
361 imagery using Marked Point Processes and a geometrical-optical model. *Remote Sens.*  
362 *Environ.* **2018**, *211*, 184–195.
- 363 11. Li, W.; Fu, H.; Yu, L.; Cracknell, A. Deep Learning Based Oil Palm Tree Detection and  
364 Counting for High-Resolution Remote Sensing Images. *Remote Sens.* **2016**, *9*, 22.
- 365 12. Guirado, E.; Tabik, S.; Alcaraz-Segura, D.; Cabello, J.; Herrera, F. Deep-learning Versus  
366 OBIA for Scattered Shrub Detection with Google Earth Imagery: *Ziziphus lotus* as Case  
367 Study. *Remote Sens.* **2017**, *9*, 1220.
- 368 13. Ayrey, E.; Hayes, D. The Use of Three-Dimensional Convolutional Neural Networks to  
369 Interpret LiDAR for Forest Inventory. *Remote Sens.* **2018**, *10*, 649.
- 370 14. Zhu, X.X.; Tuia, D.; Mou, L.; Xia, G.-S.; Zhang, L.; Xu, F.; Fraundorfer, F. Deep Learning in  
371 Remote Sensing: A Comprehensive Review and List of Resources. *IEEE Geosci. Remote*  
372 *Sens. Mag.* **2017**, *5*, 8–36.
- 373 15. Dahlkamp, H.; Kaehler, A.; Stavens, D.; Thrun, S.; Bradski, G. Self-supervised Monocular  
374 Road Detection in Desert Terrain. In Proceedings of the Robotics: Science and Systems II;  
375 Robotics: Science and Systems Foundation, 2006.

- 376 16. Wu, H.; Prasad, S. Semi-Supervised Deep Learning Using Pseudo Labels for Hyperspectral  
377 Image Classification. *IEEE Trans. Image Process.* **2018**, *27*, 1259–1270.
- 378 17. Romero, A.; Ballas, N.; Kahou, S.E.; Chassang, A.; Gatta, C.; Bengio, Y. FitNets: Hints for  
379 Thin Deep Nets. **2014**, 1–13.
- 380 18. Erhan, D.; Manzagol, P.-A.; Bengio, Y.; Bengio, S.; Vincent, P. The Difficulty of Training  
381 Deep Architectures and the Effect of Unsupervised Pre-Training. *Twelfth Int. Conf. Artif.*  
382 *Intell. Stat. (AISTATS), JMLR Work. Conf. Proceedings* **2009**, *5*, 153–160.
- 383 19. Dalponte, M.; Coomes, D.A. Tree-centric mapping of forest carbon density from airborne  
384 laser scanning and hyperspectral data. *Methods Ecol. Evol.* **2016**, *7*, 1236–1245.
- 385 20. Li, W.; Guo, Q.; Jakubowski, M.K.; Kelly, M. A New Method for Segmenting Individual  
386 Trees from the Lidar Point Cloud. *Photogramm. Eng. Remote Sens.* **2012**, *78*, 75–84.
- 387 21. Silva, C.A.; Hudak, A.T.; Vierling, L.A.; Loudermilk, E.L.; O'Brien, J.J.; Hiers, J.K.; Jack, S.B.;  
388 Gonzalez-Benecke, C.; Lee, H.; Falkowski, M.J.; et al. Imputation of Individual Longleaf  
389 Pine (*Pinus palustris* Mill.) Tree Attributes from Field and LiDAR Data. *Can. J. Remote*  
390 *Sens.* **2016**, *42*, 554–573.
- 391 22. Roussel, J.-R.; David Auty lidR: Airborne LiDAR Data Manipulation and Visualization for  
392 Forestry Applications. **2019**.
- 393 23. Uijlings, J.R.R.; Van De Sande, K.E.A.; Gevers, T.; Smeulders, A.W.M. Selective search for  
394 object recognition. *Int. J. Comput. Vis.* **2013**, *104*, 154–171.
- 395 24. Ren, S.; He, K.; Girshick, R.; Sun, J. Faster r-cnn: Towards real-time object detection with  
396 region proposal networks. *Nips* **2015**, 91–99.
- 397 25. Lin, T.Y.; Goyal, P.; Girshick, R.; He, K.; Dollar, P. Focal Loss for Dense Object Detection.

- 398 *Proc. IEEE Int. Conf. Comput. Vis.* **2017**, 2017–Octob, 2999–3007.
- 399 26. Hans Gaiser, Maarten de Vries, Valeriu Lacatusu, Ashley Williamson, Enrico Liscio, D.D.  
400 fizy-r/Keras-retinanet 2018.
- 401 27. He, K.; Zhang, X.; Ren, S.; Sun, J. Deep Residual Learning for Image Recognition. *Comput.*  
402 *Vis. Pattern Recognit. (CVPR), 2016* **2016**, 770–778.
- 403 28. Vastaranta, M.; Kankare, V.; Holopainen, M.; Yu, X.; Hyyppä, J.; Hyyppä, H. Combination  
404 of individual tree detection and area-based approach in imputation of forest variables  
405 using airborne laser data. *ISPRS J. Photogramm. Remote Sens.* **2012**, 67, 73–79.
- 406 29. Duncanson, L.I.; Cook, B.D.; Hurtt, G.C.; Dubayah, R.O. An efficient, multi-layered crown  
407 delineation algorithm for mapping individual tree structure across multiple ecosystems.  
408 *Remote Sens. Environ.* **2014**, 154, 378–386.
- 409 30. Coomes, D.A.; Dalponte, M.; Jucker, T.; Asner, G.P.; Banin, L.F.; Burslem, D.F.R.P.; Lewis,  
410 S.L.; Nilus, R.; Phillips, O.L.; Phua, M.H.; et al. Area-based vs tree-centric approaches to  
411 mapping forest carbon in Southeast Asian forests from airborne laser scanning data.  
412 *Remote Sens. Environ.* **2017**, 194, 77–88.
- 413 31. Yin, D.; Wang, L. Individual mangrove tree measurement using UAV-based LiDAR data:  
414 Possibilities and challenges. *Remote Sens. Environ.* **2019**, 223, 34–49.
- 415 32. Jeronimo, S.M.A.; Kane, V.R.; Churchill, D.J.; McGaughey, R.J.; Franklin, J.F. Applying  
416 LiDAR Individual Tree Detection to Management of Structurally Diverse Forest  
417 Landscapes. *J. For.* **2018**, 116, 336–346.
- 418 33. Zhou, Y.; Tuzel, O. VoxelNet: End-to-End Learning for Point Cloud Based 3D Object  
419 Detection. **2017**.

- 420 34. Qi, C.R.; Su, H.; Mo, K.; Guibas, L.J. PointNet: Deep learning on point sets for 3D  
421 classification and segmentation. *Proc. - 30th IEEE Conf. Comput. Vis. Pattern Recognition,*  
422 *CVPR 2017* **2017**, 2017–Janua, 77–85.
- 423 35. He, K.; Gkioxari, G.; Dollar, P.; Girshick, R. Mask R-CNN. *Proc. IEEE Int. Conf. Comput. Vis.*  
424 **2017**, 2017–Octob, 2980–2988.
- 425 36. Wallace, L.; Lucieer, A.; Watson, C.S. Evaluating tree detection and segmentation  
426 routines on very high resolution UAV LiDAR ata. *IEEE Trans. Geosci. Remote Sens.* **2014**,  
427 *52*, 7619–7628.
- 428 37. Wulder, M.A.; Dymond, C.C.; White, J.C.; Leckie, D.G.; Carroll, A.L. Surveying mountain  
429 pine beetle damage of forests: A review of remote sensing opportunities. *For. Ecol.*  
430 *Manage.* **2006**, *221*, 27–41.
- 431 38. Vogeler, J.C.; Yang, Z.; Cohen, W.B. Mapping post-fire habitat characteristics through the  
432 fusion of remote sensing tools. *Remote Sens. Environ.* **2016**, *173*, 294–303.
- 433 39. Deng, S.; Katoh, M.; Yu, X.; Hyyppä, J.; Gao, T. Comparison of tree species classifications  
434 at the individual tree level by combining ALS data and RGB images using different  
435 algorithms. *Remote Sens.* **2016**, *8*.
- 436
